# Supplementary material for: Development of Stable Pickering Emulsions with TEMPO-Oxidized Chitin Nanocrystals for Encapsulation of Quercetin
Source: Foods. 2023 Jan 12;12(2):367. doi: 10.3390/foods12020367 (PMC9857725; doi:10.3390/foods12020367)
Supplement: Supplementary file 1 [file foods-12-00367-s001.zip › foods-2068378-supplementary.pdf]

Supplementary Material

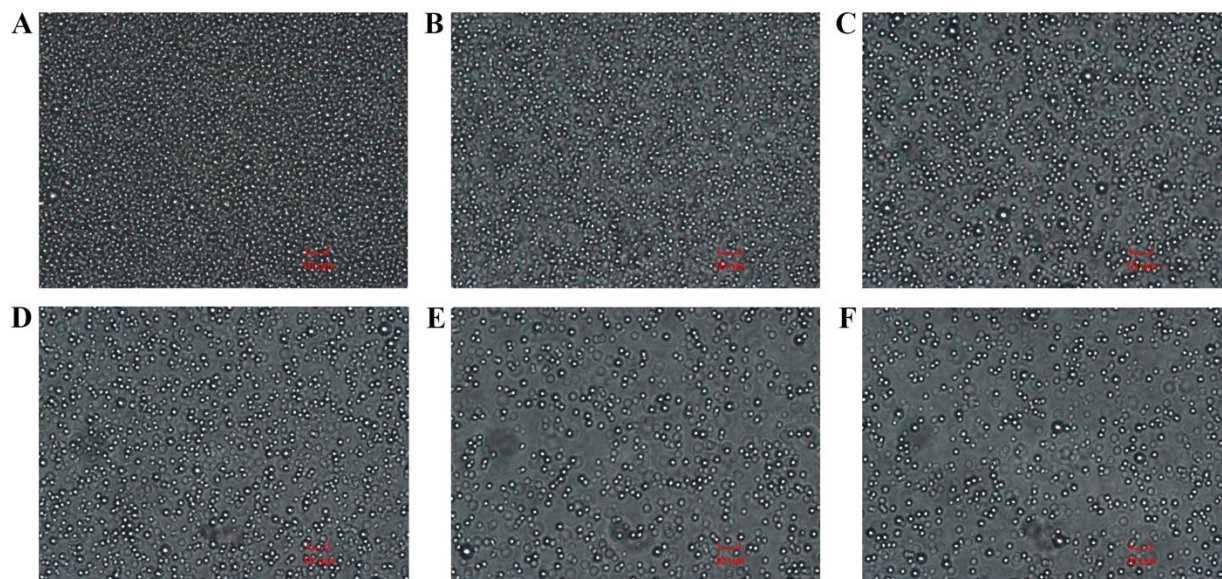

**Figure S1.** Optical micrographs of fresh Pickering emulsions stabilized with different concentrations of TEMPO-oxidized ChNCs at pH 7 (The scale bar was 10  $\mu\text{m}$ ): (A) 1.0 wt%; (B) 0.5wt%; (C) 0.1wt%; (D) 0.05wt%; (E) 0.01wt%; (F) 0.005wt%.

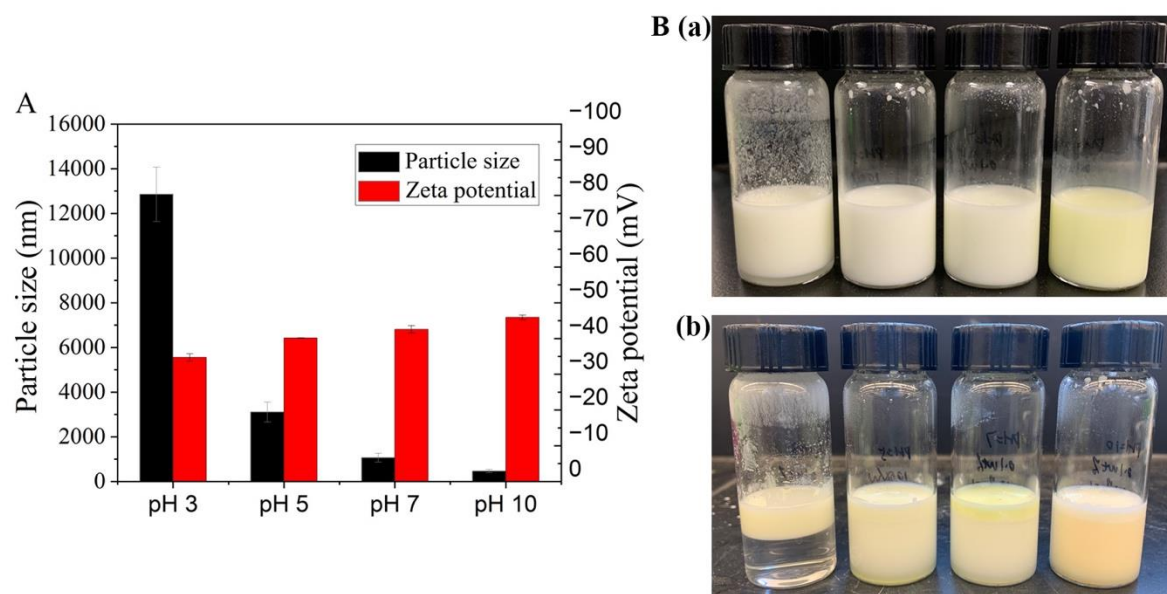

**Figure S2.** (A) Mean droplet diameter and zeta potential of Pickering emulsions stabilized by TEMPO-oxidized ChNCs with different pH values. (B) Photographs of fresh Pickering emulsion (a) at different pH levels (from left to right pH 3, 5, 7, 10) and (b) stored for 14 days.

**Table S1.** Cream fraction and oil fraction of emulsions with different concentrations of T-ChNCs were added.

| <b>T-ChNCs<br/>concentration (wt%)</b> | <b>Cream fraction</b> | <b>Oil fraction</b> |
|----------------------------------------|-----------------------|---------------------|
| 1                                      | 0.14±0.00             | 0±0                 |
| 0.5                                    | 0.14±0.01             | 0±0                 |
| 0.1                                    | 0.13±0.01             | 0±0                 |
| 0.05                                   | 0.12±0.01             | 0±0                 |
| 0.01                                   | 0.10±0.01             | 0.03±0.01           |
| 0.005                                  | 0.10±0.01             | 0.68±0.01           |
